# Supplementary material for: Whole transcriptome analysis of the differential RNA profiles and associated competing endogenous RNA networks in LPS-induced acute lung injury (ALI)
Source: PubMed Central journal article supplement (PMC8104378; doi:10.1371/journal.pone.0251359), 2021-05-07

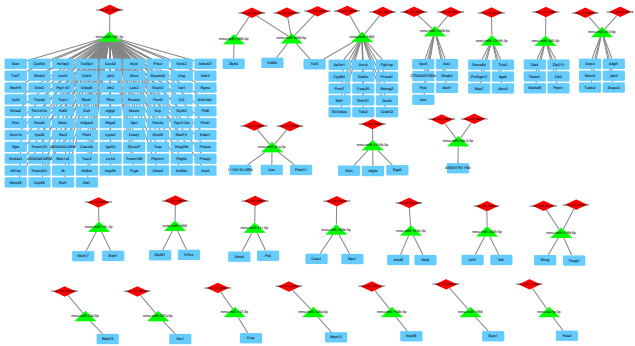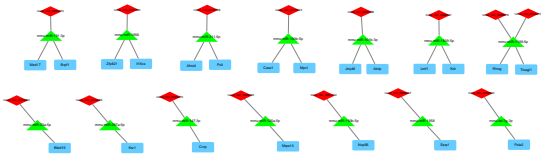

Supplement: pone.0251359.s007.pdf [file pone.0251359.s007.pdf]
